# Supplementary material for: Polystyrenes with both hydrophilic and hydrophobic moieties: synthesis and self-assembly behaviors
Source: Royal Society of Chemistry journal article supplement (doi:10.1039/d3sm00426k), 2023-01-01
Supplement: d3sm00426k1.pdf [file d3sm00426k1.pdf]

## Supporting Information

### Polystyrenes with both hydrophilic and hydrophobic moieties: synthesis and self-assembly behaviors

Di Zhou, Ping Fu, Tian Gao, Zhi-Kang Xu and Ling-Shu Wan<sup>\*</sup>

MOE Key Laboratory of Macromolecular Synthesis and Functionalization, MOE Engineering  
Research Center of Membrane and Water Treatment Technology, and Key Laboratory of  
Adsorption and Separation Materials & Technologies of Zhejiang Province, Department of  
Polymer Science and Engineering, Zhejiang University, Hangzhou 310058, China.

<sup>\*</sup>Corresponding author. E-mail: lswan@zju.edu.cn

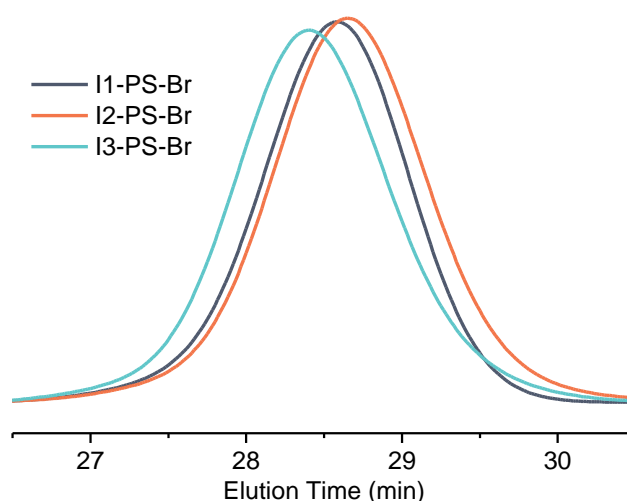

**Fig. S1** GPC curves of I1/2/3-initiated polystyrenes ended with bromine (In-PS-Br).

**Table S1** Results of polystyrenes prepared via ATRP using different difunctional initiators.

| Sample   | Initiator | Reaction Time (min) | Conv. (%) <sup>a</sup> | Yield (%) <sup>b</sup> | $M_{n,GPC}$ <sup>c</sup> | PDI <sup>c</sup> |
|----------|-----------|---------------------|------------------------|------------------------|--------------------------|------------------|
| I1-PS-Br | I1        | 11                  | 6.98                   | 7.77%                  | 3600                     | 1.09             |
| I2-PS-Br | I2        | 14                  | 6.21                   | 7.10%                  | 3400                     | 1.11             |
| I3-PS-Br | I3        | 15                  | 6.61                   | 7.60%                  | 3800                     | 1.11             |

<sup>a</sup>Refer to the conversion rates of monomers and were calculated through the equation of Conv.% =  $(W_p - W_I)/W_{St}$ , where  $W_p$ ,  $W_I$ , and  $W_{St}$  refer to the weight/mass of resultant polymer product, initiators in feed, and styrene monomers in feed, respectively. <sup>b</sup>Calculated by the equation of yield (%) =  $W_p/(W_{St} + W_I)$ . <sup>c</sup>Results obtained from GPC measurements.

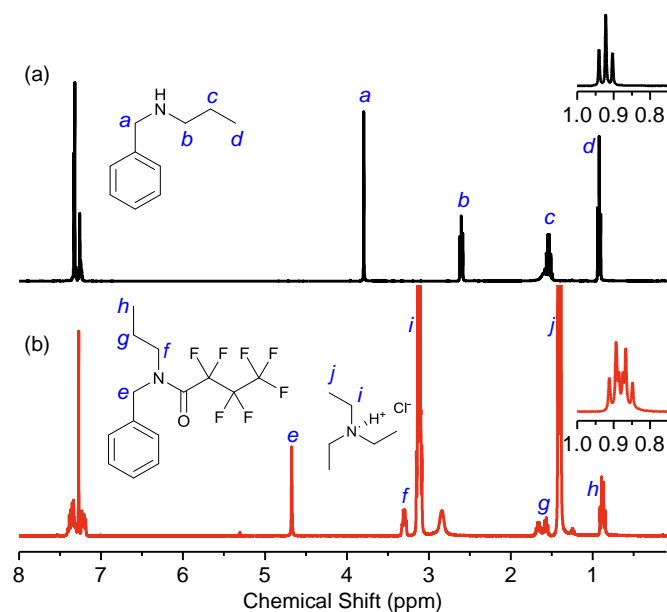

**Fig. S2**  $^1\text{H}$  NMR curves of (a) *N*-propylbenzylamine and (b) its product mixture after reacting with  $\text{C}_3\text{F}_7\text{COCl}$  with triethylamine as the deacid agent. Insets are molecular structures of the reactants and product, and the spectra of peak *d* or *h*.

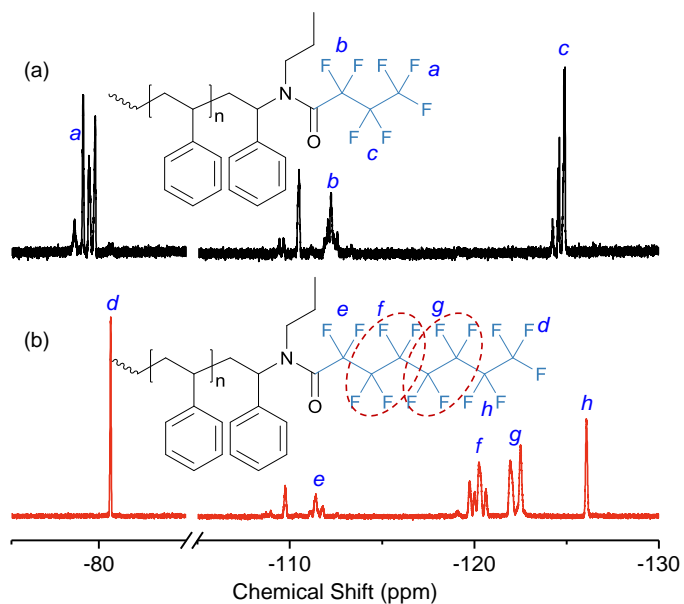

**Fig. S3**  $^{19}\text{F}$  NMR spectra of (a) I1-PS-7F and (b) I1-PS-15F. The low signal-to-noise ratio is ascribed to the relatively low content of fluorine atoms in the polymer chains.

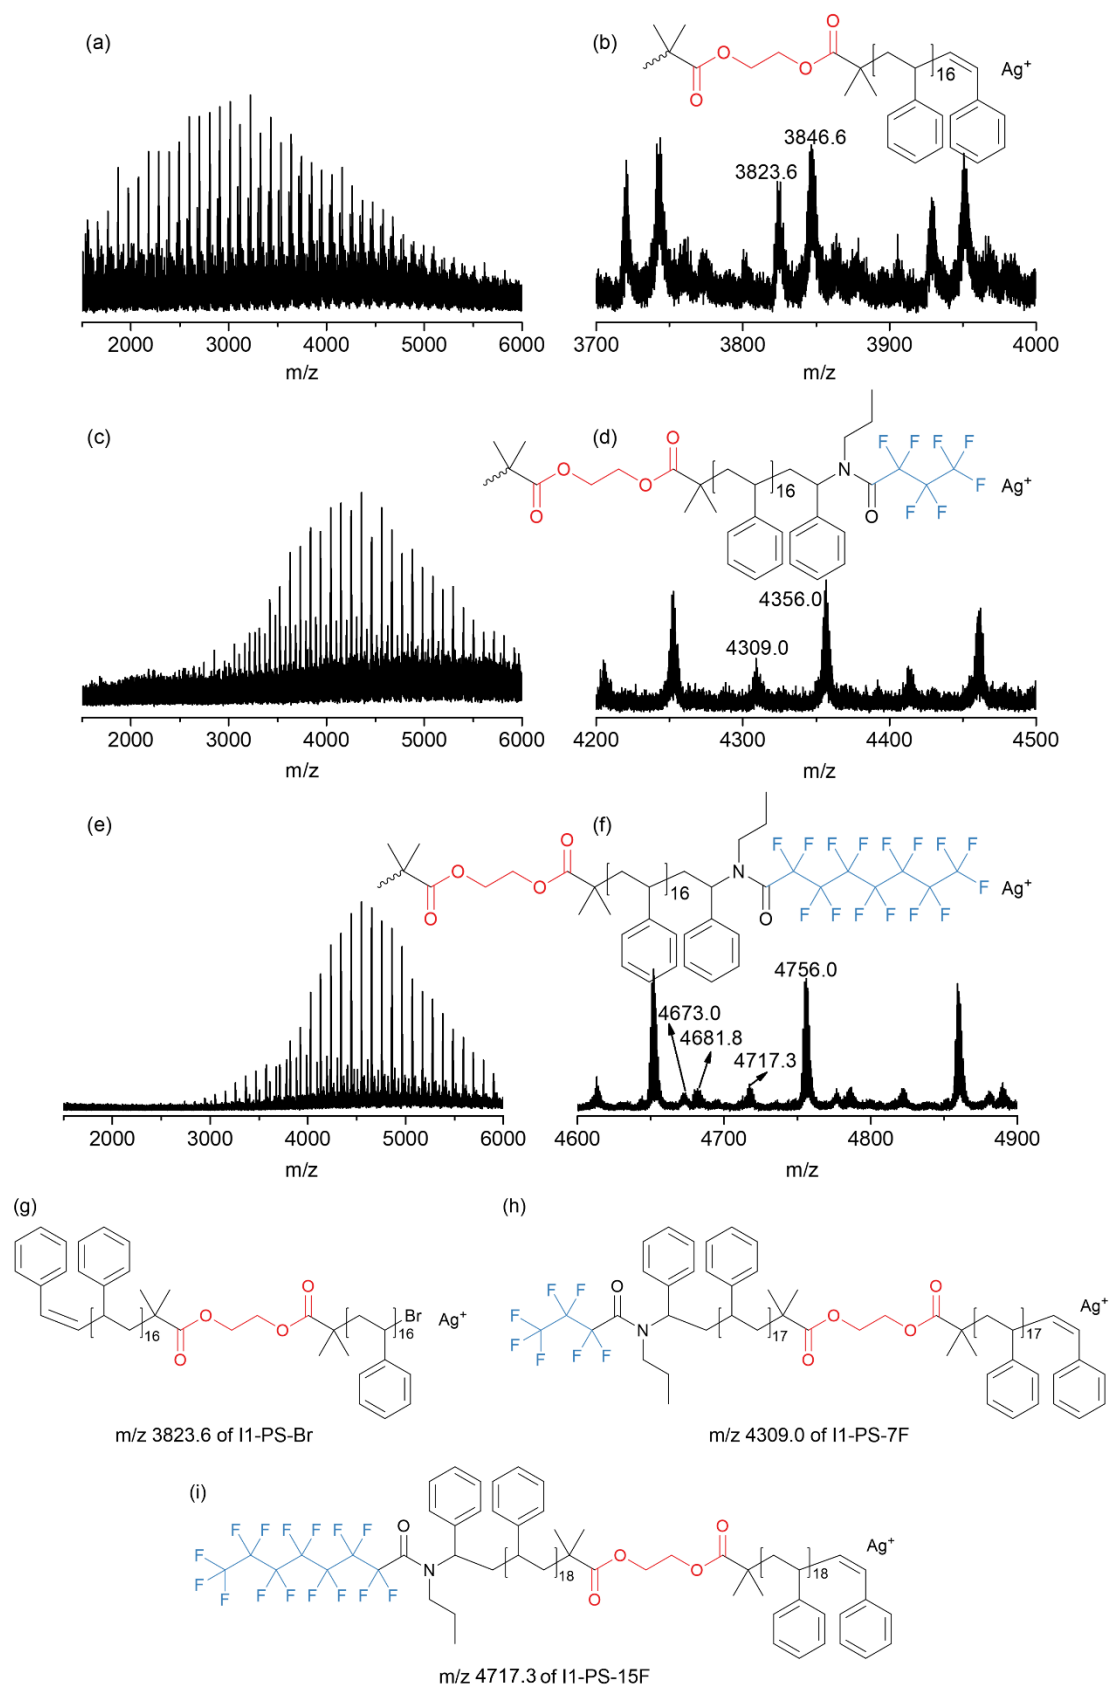

**Fig. S4** MALDI-TOF MS spectra of (a, b) I1-PS-Br, (c, d) I1-PS-7F, and (e, f) I1-PS-15F. Insets show the molecular structures that correlate to the main peaks. (g–h) Possible molecular structures that correlate to the side peaks in (b), (d), and (h), respectively.

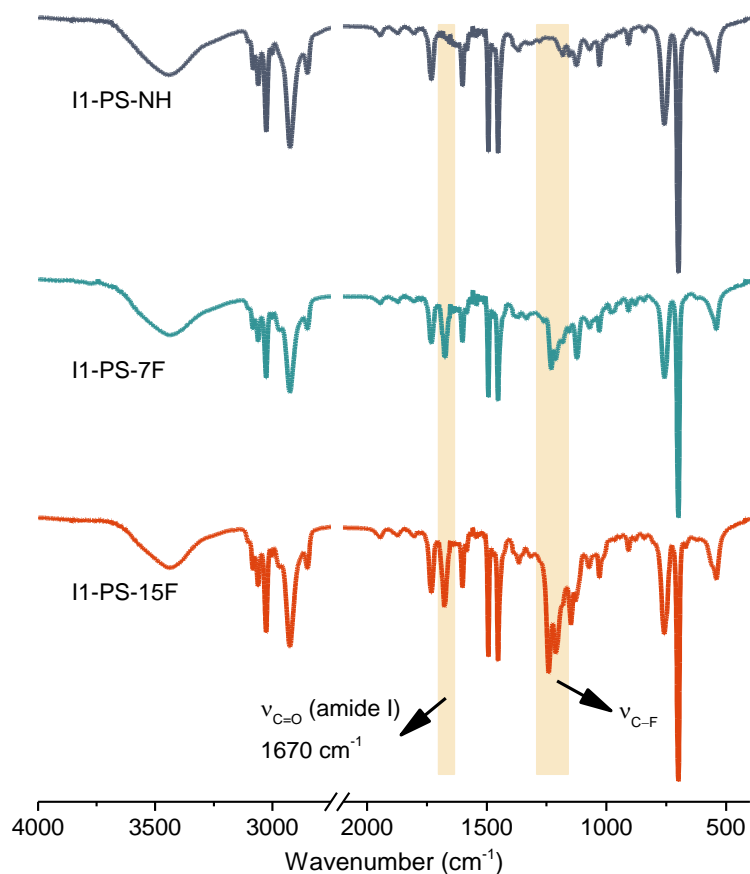

**Fig. S5** FTIR spectra of I1-PS-NH, I1-PS-7F, and I1-PS-15F.

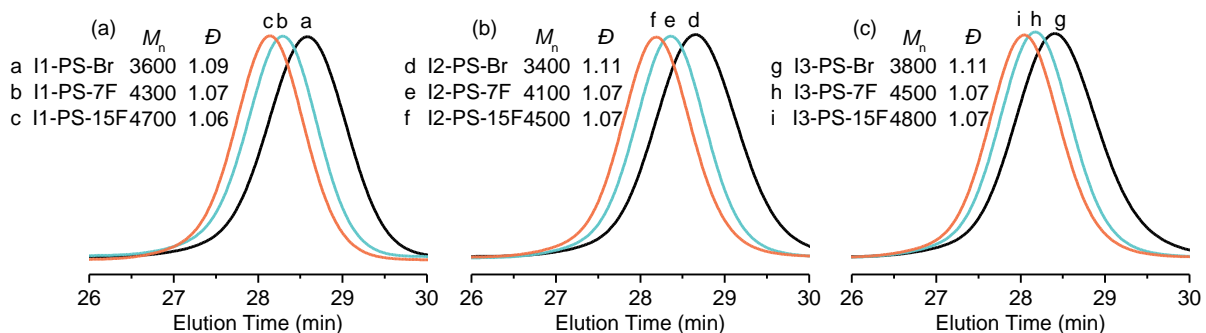

**Fig. S6** GPC curves of (a) I1, (b) I2, and (c) I3-initiated polystyrenes with bromine (In-PS-Br), heptafluorobutyryl (In-PS-7F), or pentadecafluorooctanoyl (In-PS-15F) end groups. Insets show the number-average molecular weight ( $M_n$ ) and the polydispersity index ( $\bar{D}$ ) of each polymer.

### Method for the calculation of surface free energies:

After obtaining the static contact angles of water and CH<sub>2</sub>I<sub>2</sub> on the flat films, the surface free energies can be calculated using Owens method:<sup>1</sup>

$$(1 + \cos\theta)\gamma_l = 2(\gamma_s^d \gamma_l^d)^{1/2} + 2(\gamma_s^p \gamma_l^p)^{1/2}$$

$$\gamma_s = \gamma_s^d + \gamma_s^p$$

$$\gamma_l = \gamma_l^d + \gamma_l^p$$

where  $\gamma_l$  and  $\gamma_s$  are the surface free energies of the liquids and the solid substrates, respectively. The superscripts of  $d$  and  $p$  indicate the dispersion and polar force component of surface free energies, respectively; the sum of which denotes the apparent surface free energies. Normally, the strong-polar H<sub>2</sub>O and low-polar CH<sub>2</sub>I<sub>2</sub> are used as testing liquids.  $\gamma_{\text{H}_2\text{O}}^d$ ,  $\gamma_{\text{H}_2\text{O}}^p$ ,  $\gamma_{\text{CH}_2\text{I}_2}^d$ , and  $\gamma_{\text{CH}_2\text{I}_2}^p$  are known as 21.8, 51.0, 48.5, and 2.3 mJ m<sup>-2</sup>, respectively.<sup>1</sup> By measuring the static contact angles ( $\theta$ ) of H<sub>2</sub>O and CH<sub>2</sub>I<sub>2</sub> on a solid substrate, two equations are obtained which can be solved for  $(\gamma_s^d)^{1/2}$  and  $(\gamma_s^p)^{1/2}$ . Thus the  $\gamma_s$  is obtained.

**Table S2** Calculation of surface free energies of flat films prepared from polystyrenes with various functional groups.

| Sample    | Contact Angle (°) |                                | $(\gamma_s^d)^{1/2}$<br>(mJ <sup>1/2</sup> m <sup>-1</sup> ) | $(\gamma_s^p)^{1/2}$<br>(mJ <sup>1/2</sup> m <sup>-1</sup> ) <sup>a</sup> | $\gamma_s$ (mJ m <sup>-2</sup> ) <sup>a</sup> |
|-----------|-------------------|--------------------------------|--------------------------------------------------------------|---------------------------------------------------------------------------|-----------------------------------------------|
|           | H <sub>2</sub> O  | CH <sub>2</sub> I <sub>2</sub> |                                                              |                                                                           |                                               |
| I1-PS-Br  | 99.1±1.9          | 20.4±1.2                       | 7.04                                                         | -0.31                                                                     | 49.62                                         |
| I1-PS-7F  | 100.2±1.4         | 28.0±0.6                       | 6.84                                                         | -0.28                                                                     | 46.85                                         |
| I1-PS-15F | 102.3±1.8         | 37.9±0.4                       | 6.49                                                         | -0.23                                                                     | 42.18                                         |
| I2-PS-Br  | 97.9±1.0          | 21.0±0.4                       | 7.01                                                         | -0.19                                                                     | 49.15                                         |
| I2-PS-7F  | 93.4±1.9          | 23.6±1.1                       | 6.87                                                         | 0.31                                                                      | 47.27                                         |
| I2-PS-15F | 101.5±1.2         | 36.6±1.3                       | 6.54                                                         | -0.19                                                                     | 42.78                                         |
| I3-PS-Br  | 101.5±1.9         | 17.7±0.9                       | 7.14                                                         | -0.59                                                                     | 51.04                                         |
| I3-PS-7F  | 96.3±1.9          | 22.5±0.6                       | 6.95                                                         | 0.00                                                                      | 48.24                                         |
| I3-PS-15F | 102.7±1.3         | 36.0±0.8                       | 6.58                                                         | -0.33                                                                     | 43.35                                         |

<sup>a</sup>The negative values of  $(\gamma_s^p)^{1/2}$  are obtained for some samples which is meaningless mathematically. Same phenomena have been observed in other works and the reasons were discussed.<sup>2</sup> In that case,  $\gamma_s^p$  is regarded as zero and  $\gamma_s = \gamma_s^d$ .

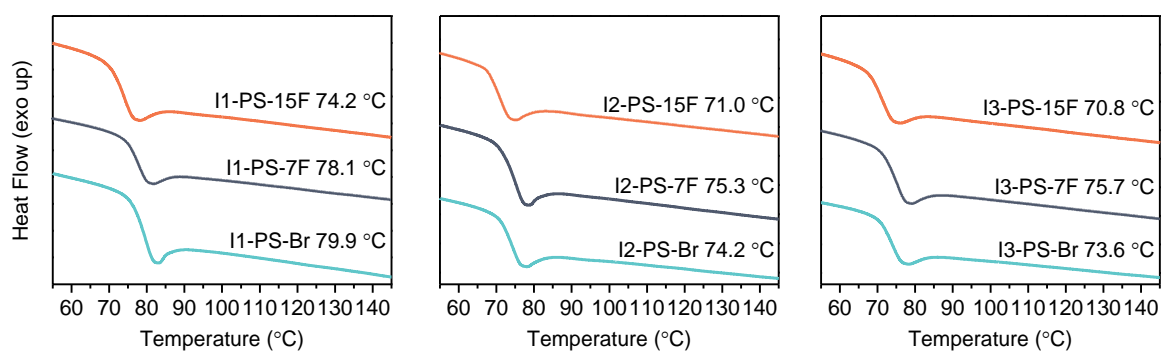

**Fig. S7** DSC curves of the polymers with  $T_g$  values marked correspondingly.



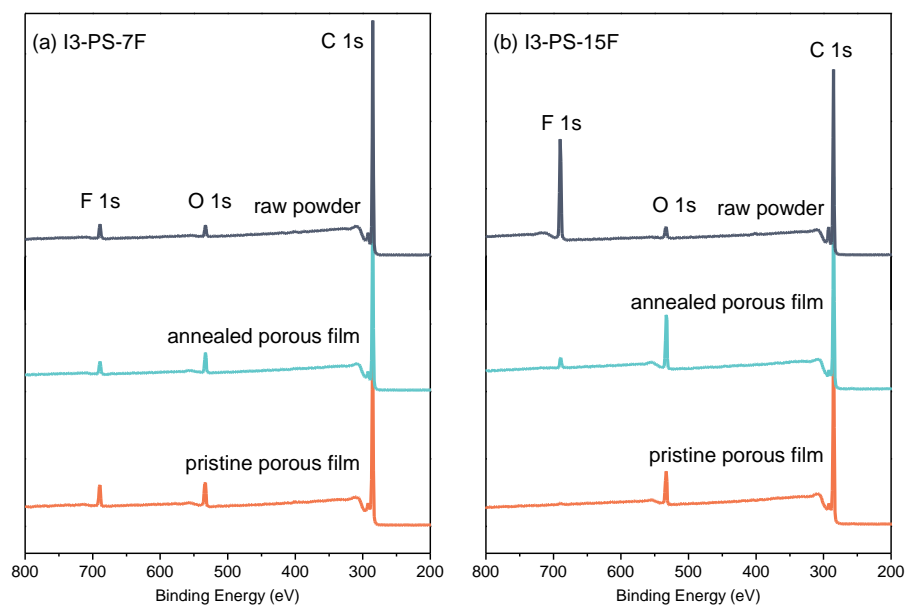

**Fig. S9** XPS wide scan spectra of (a) I3-PS-7F and (b) I3-PS-15F, including results of the pristine porous films prepared by the breath figure method, films after annealing, and powders of the raw polymers.

**Table S3** C/O/F atomic ratios of I3-PS-7F/15F materials in forms of pristine porous film prepared by the breath figure method, annealed porous film, and raw powder. XPS results and stoichiometry values are shown for comparison.

| Sample    |                      | C/O/F (at%)       |               |
|-----------|----------------------|-------------------|---------------|
|           |                      | XPS               | stoichiometry |
| I3-PS-7F  | pristine porous film | 88.6/7.1/4.3      |               |
|           | annealed porous film | 91.3/5.4/3.3      | 93.7/2.3/4.0  |
|           | raw powder           | 93.8/2.8/3.4      |               |
| I3-PS-15F | pristine porous film | <b>91.5/8.5/0</b> |               |
|           | annealed porous film | 84.8/12.6/2.6     | 89.6/2.2/8.2  |
|           | raw powder           | 78.6/3.6/17.8     |               |

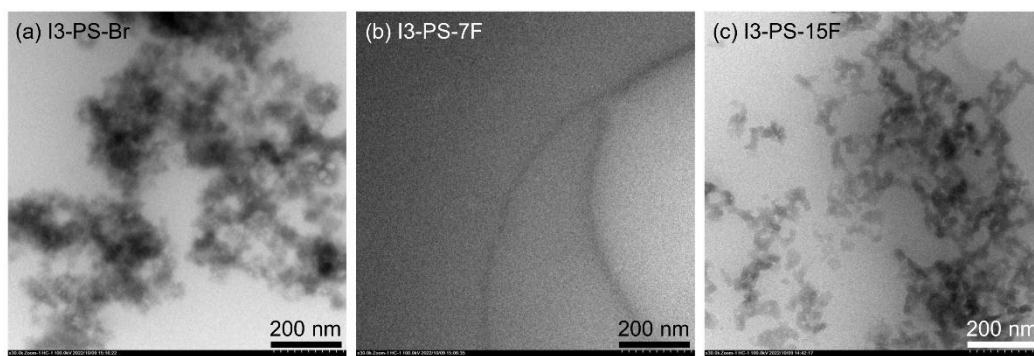

**Fig. S10** TEM images of (a) I3-PS-Br, (b) I3-PS-7F, and (c) I3-PS-15F aggregates in  $\text{CS}_2$  under a concentration of  $10 \text{ mg mL}^{-1}$ .

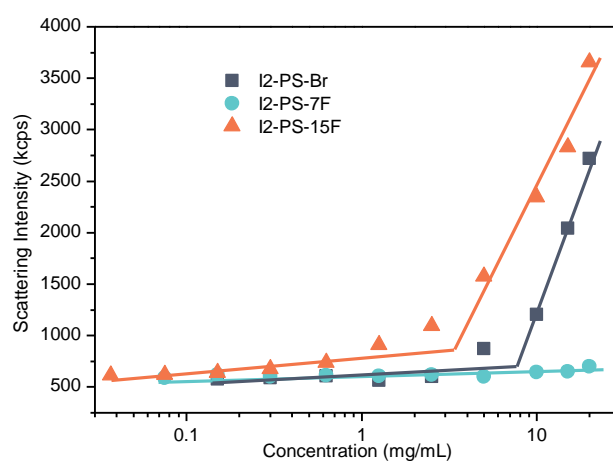

**Fig. S11** Concentration-dependent static scattering intensity of I2-initiated polystyrenes in  $\text{CS}_2$ .

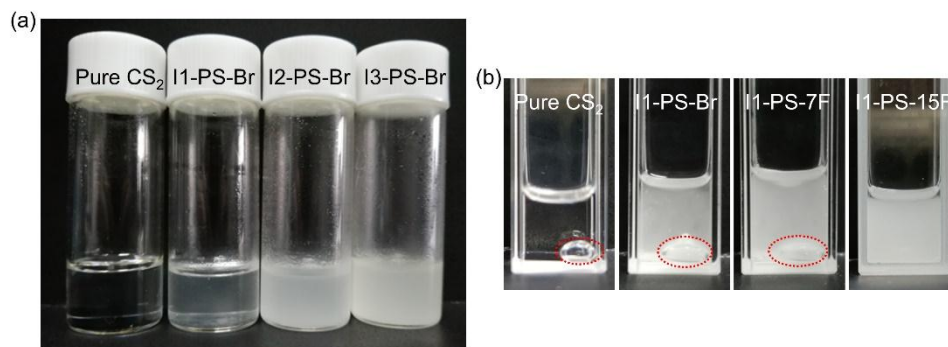

**Fig. S12** Digital photographs of polymer-in-CS<sub>2</sub> solutions after the addition of (a) water (5 μL) or (b) perfluorohexane (200 μL) and successive ultrasonication (5 min). Isolated perfluorohexane droplets which are not fully dispersed in CS<sub>2</sub> are marked with red dotted circle.

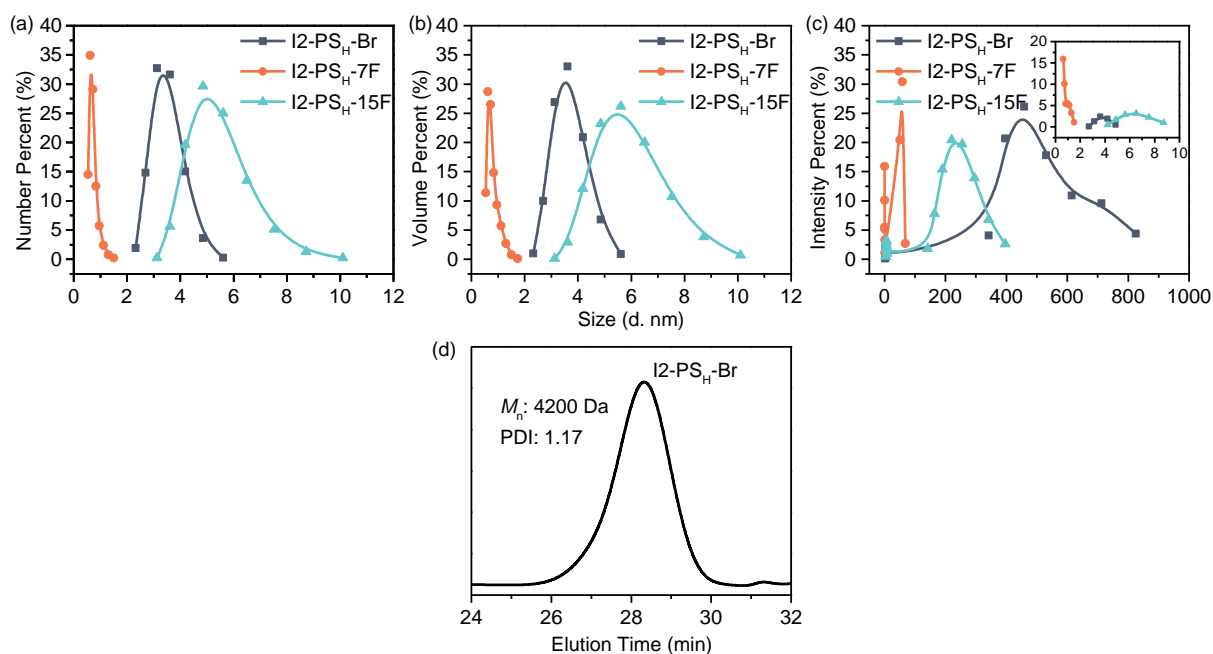

**Fig. S13** Size distributions of the aggregates of the I2-initiated polystyrenes with various end groups in CS<sub>2</sub> (10 mg mL<sup>-1</sup>) by (a) number, (b) volume, and (c) intensity. (d) GPC curves of I2-PS<sub>H</sub>-Br. The subscript H of I2-PS<sub>H</sub>-Br/7F/15F indicate the molecular weight is higher compared with I2-PS-Br. Inset in (c) shows the detailed signals correspondingly.

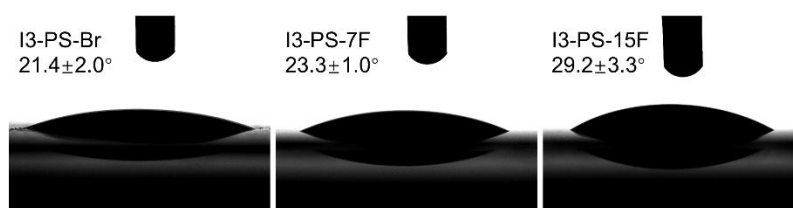

**Fig. S14** Optical images of CS<sub>2</sub> drops (3  $\mu$ L) dissolved with various polymers (10 mg mL<sup>-1</sup>) on PET substrates. Insets show the averaged contact angles.

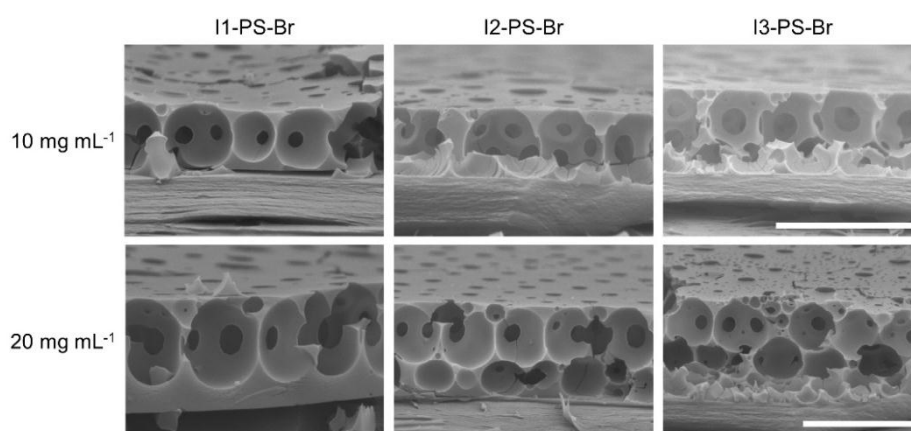

**Fig. S15** Cross-sectional SEM images of porous films of bromine-terminated polystyrenes fabricated under the concentrations of 10 and 20 mg mL<sup>-1</sup>. Scale bars are 10  $\mu$ m.

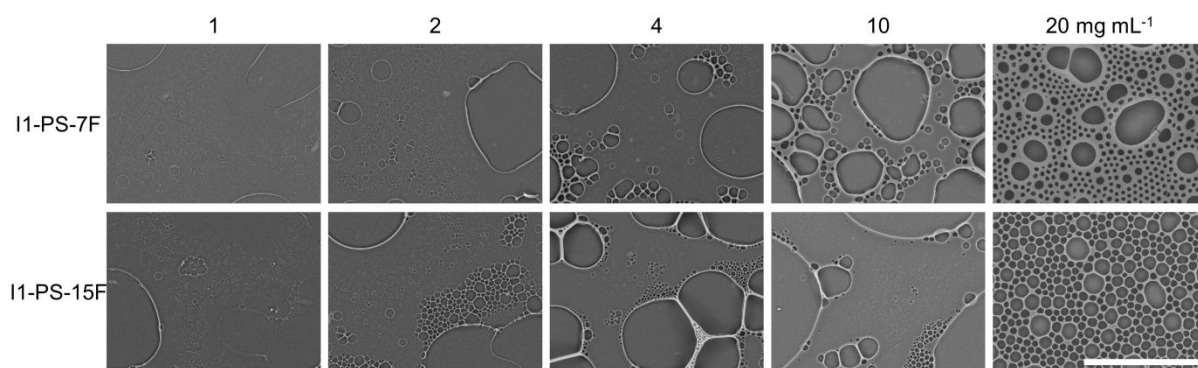

**Fig. S16** SEM images of porous films of I1-PS-7F/15F fabricated under various concentrations. The scale bar is 100  $\mu\text{m}$ .

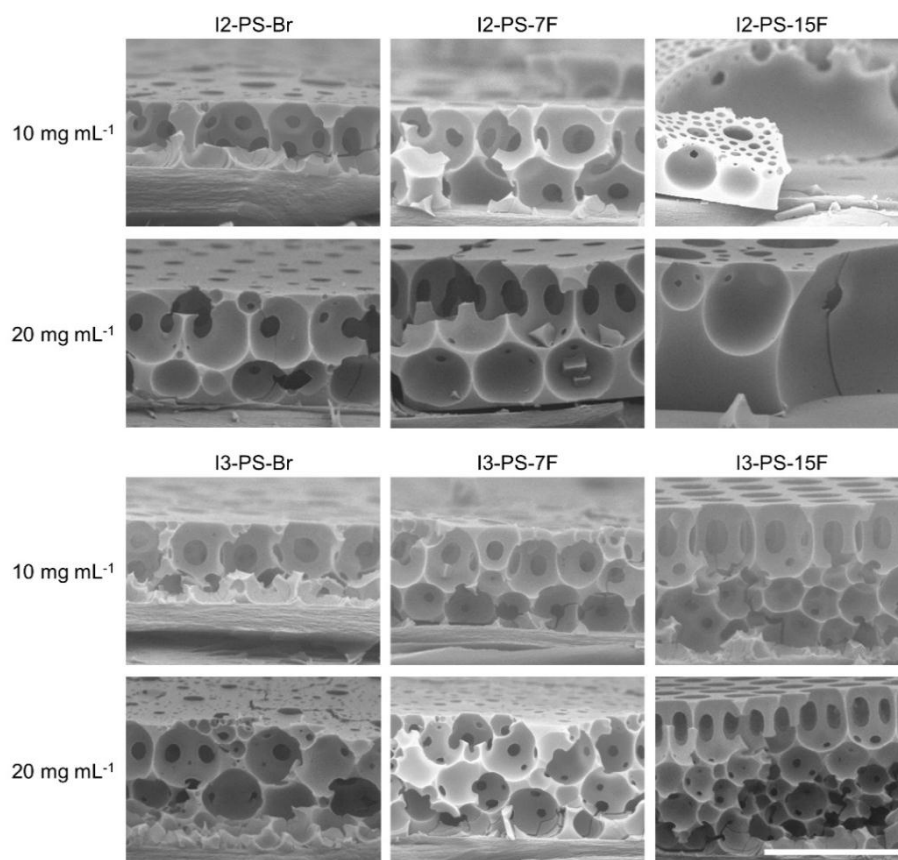

**Fig. S17** Cross-sectional SEM images of porous films of I2- and I3-initiated polystyrenes with various end groups fabricated under concentrations of 10 and 20 mg mL<sup>-1</sup>. Scale bar is 10  $\mu\text{m}$ .

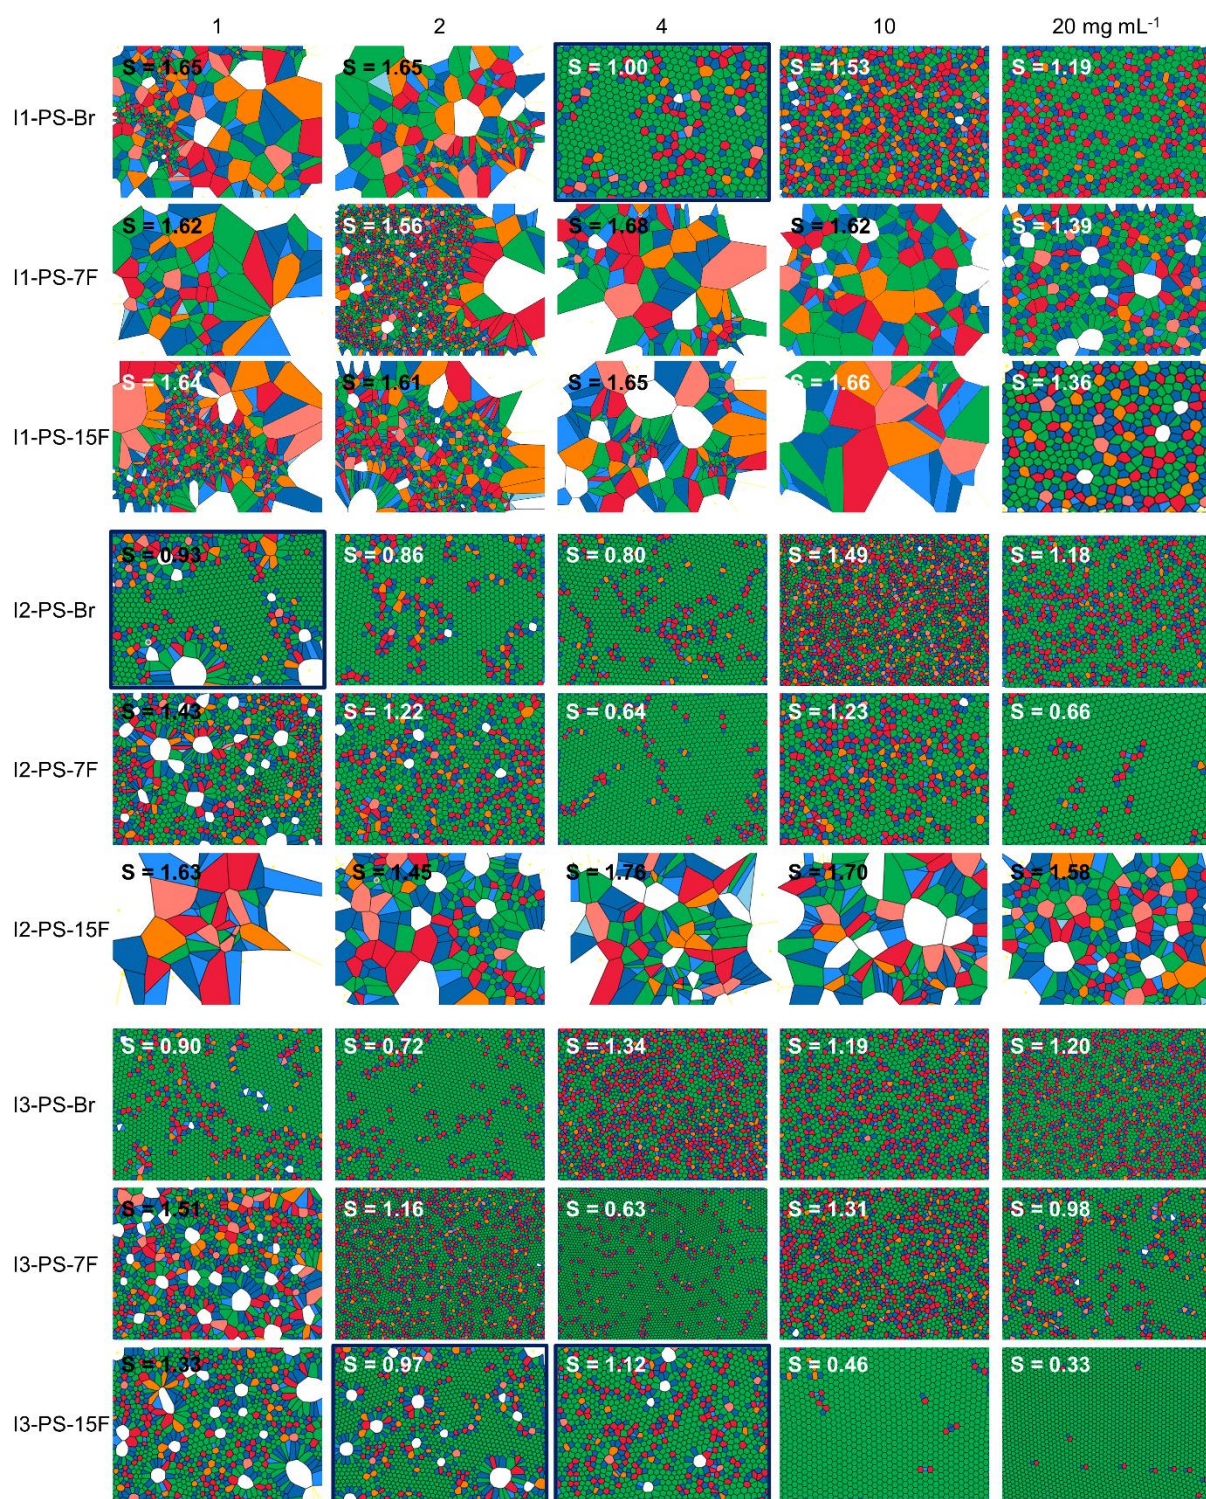

**Fig. S18** Voronoi diagrams of SEM images of porous films prepared from different polymers at various concentrations. The corresponding conformational entropy ( $S$ ) values are shown. Pictures highlighted with blue border emphasize patterns coexisted with hexagonally-packed pores (green) and much larger pores (white) whose  $S$  are smaller than 1.2, still, we consider them as irregular pattern.

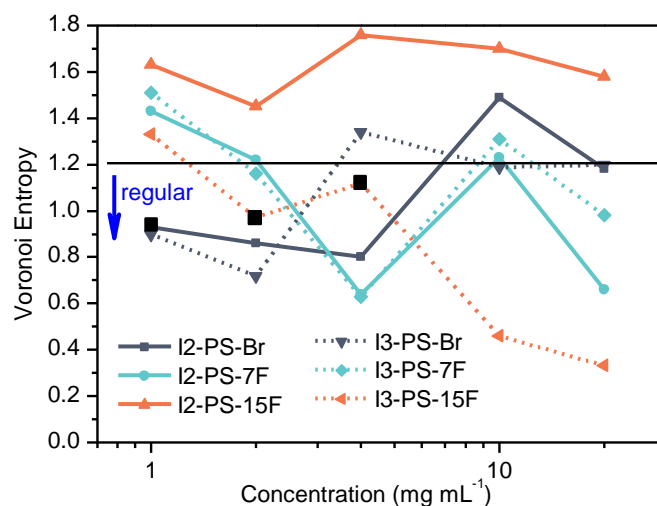

**Fig. S19** Summarized conformational entropy values of porous films prepared from different polymers at various concentrations. Solid and dashed lines represent I2- and I3-initiated polystyrenes, respectively. S of 1.2 is set as a critical condition for the differentiation of regular and irregular pattern. Samples with S smaller than 1.2 but are irregular in practice are marked with black cubes.

#### References:

- 1 D. K. Owens and R. C. Wendt, *J. Appl. Polym. Sci.*, 1969, **13**, 1741-1747.
- 2 T. Białopiotrowicz, *J. Adhes. Sci. Technol.*, 2007, **21**, 1557-1573.
